# Supplementary material for: Low-temperature synthesis of homogeneous solid solutions of scheelite-structured Ca1−xSrxWO4 and Sr1−xBaxWO4 nanocrystals
Source: Royal Society of Chemistry journal article supplement (doi:10.1039/c5dt01722j), 2015-01-01
Supplement: c5dt01722j1.pdf [file c5dt01722j1.pdf]

## Electronic Supporting Information

### Low-Temperature Synthesis of Homogeneous Solid Solutions of Scheelite- Structured $\text{Ca}_{1-x}\text{Sr}_x\text{WO}_4$ and $\text{Sr}_{1-x}\text{Ba}_x\text{WO}_4$ Nanocrystals

Sean P. Culver, Matthew J. Greaney, Antonio Tinoco, and Richard L. Brutchey\*

\*To whom correspondence should be addressed. Email: [brutchey@usc.edu](mailto:brutchey@usc.edu).

Department of Chemistry, University of Southern California, Los Angeles, California  
90089, USA

## Figures and Tables

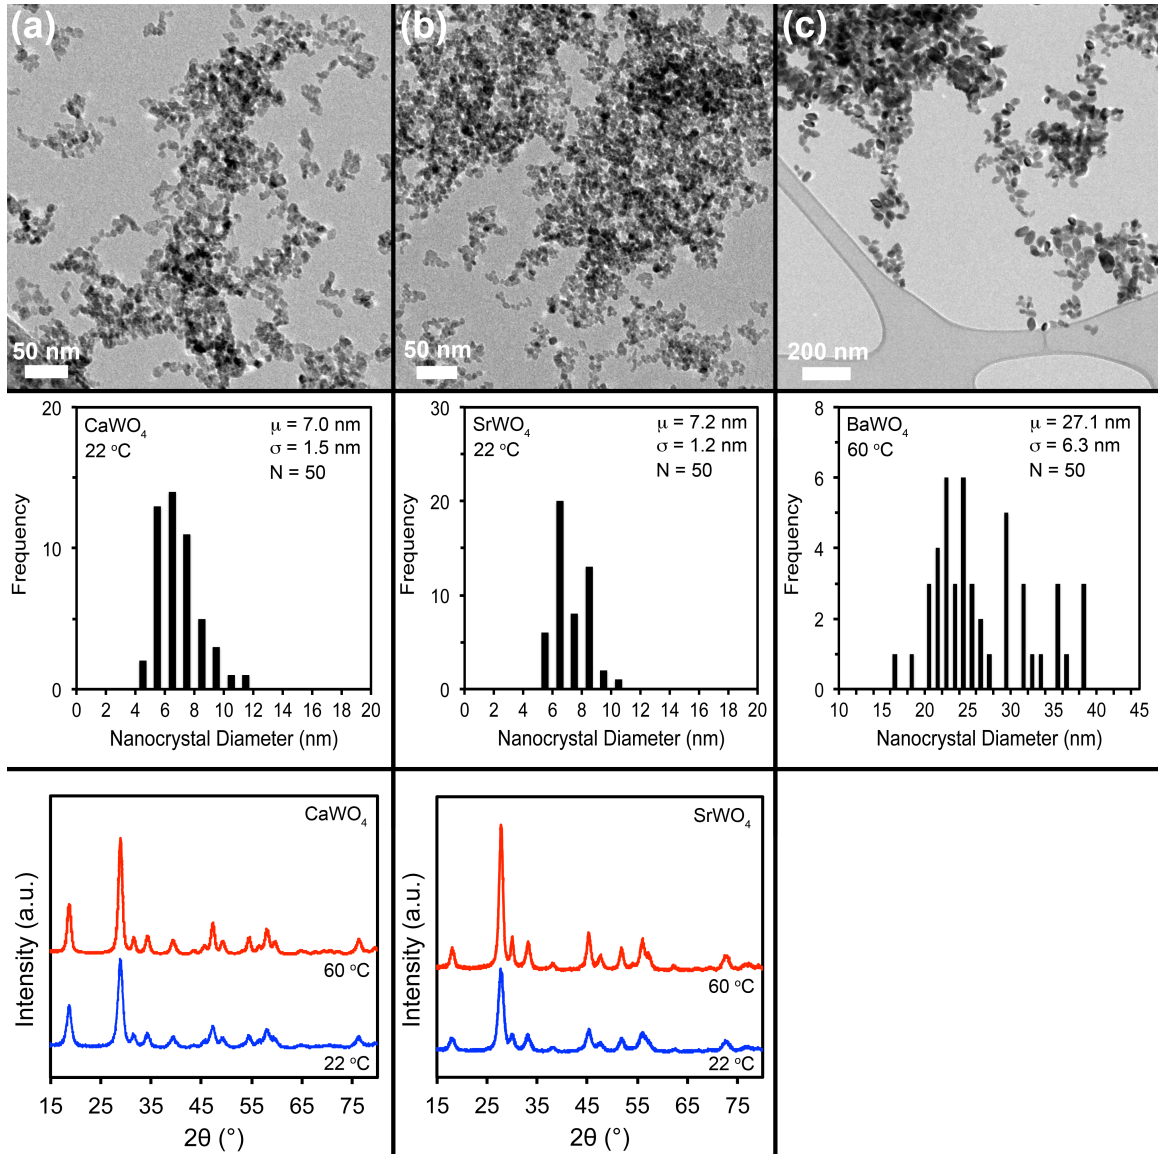

**Fig. S1** TEM images of (a)  $\text{CaWO}_4$  and (b)  $\text{SrWO}_4$  products aged at 22 °C under nitrogen for 24 h and (c)  $\text{BaWO}_4$  aged at 60 °C under nitrogen for 24 h with associated nanocrystal size distribution histograms. Diffractograms illustrating the effects of thermal aging are also provided for  $\text{CaWO}_4$  and  $\text{SrWO}_4$ .

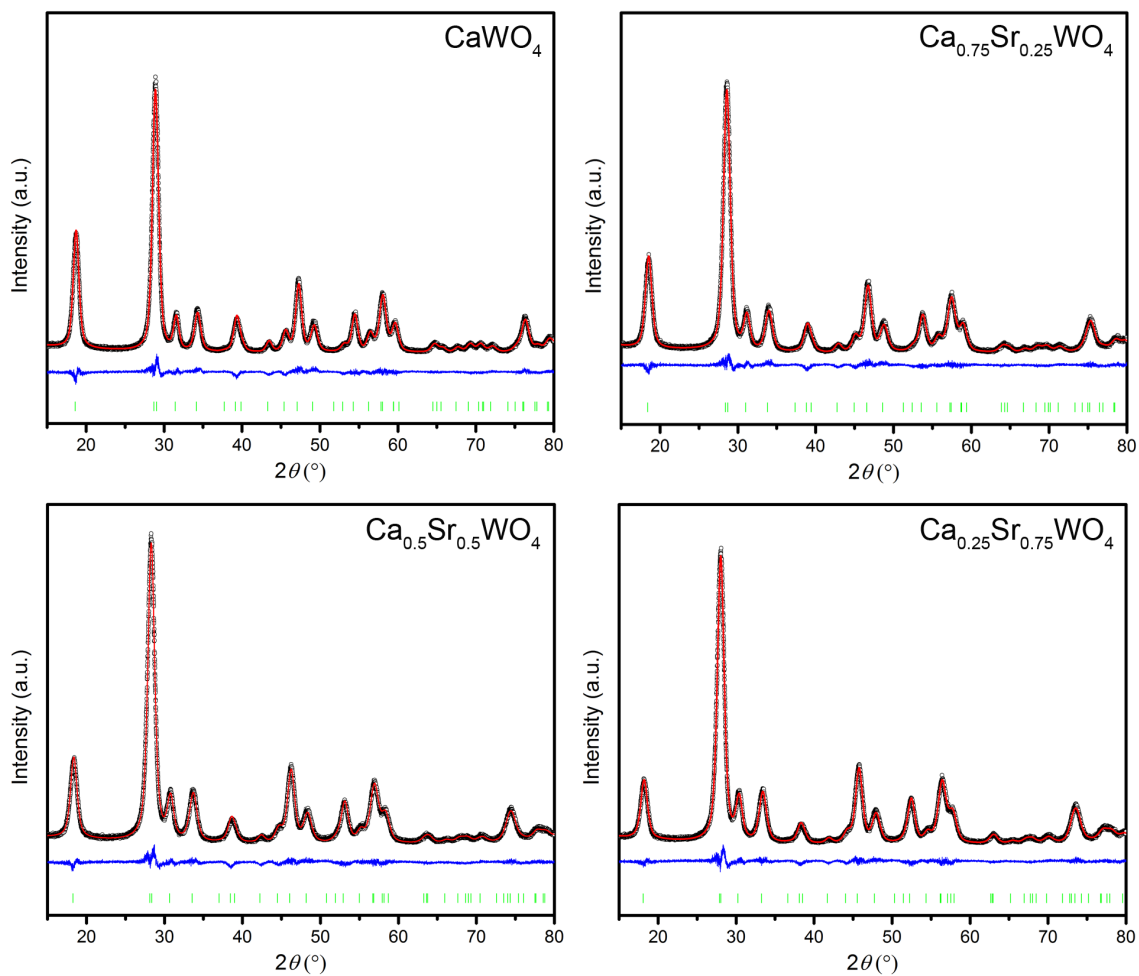

**Fig. S2** Rietveld analysis of XRD patterns for  $A_{1-x}A'_xWO_4$  nanocrystal solid solutions. Experimental (O) and calculated (—) patterns are shown for each sample along with the difference curve (—) and tickmarks (|) corresponding to the phase refined. The nominal composition of each phase is indicated in the top right of each pattern. —Continues on the following page.

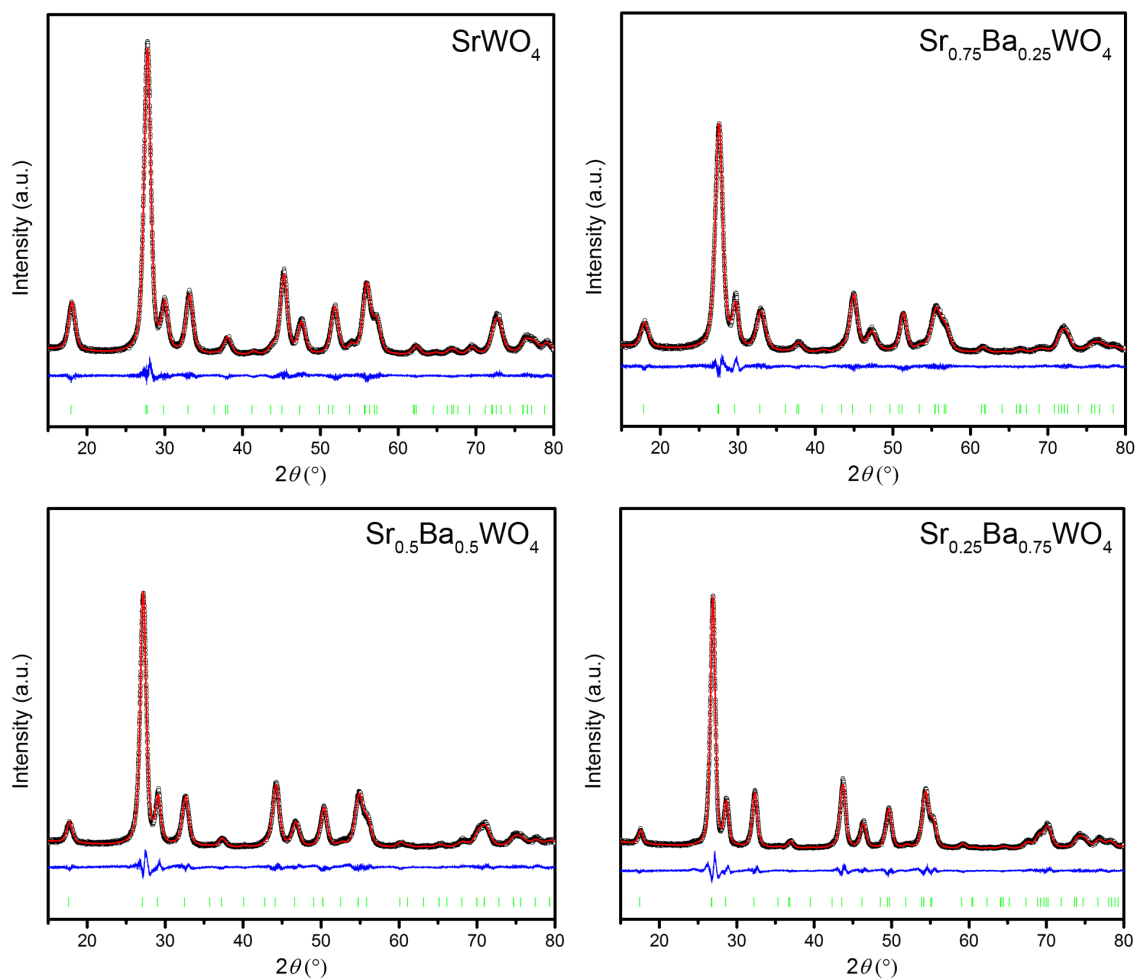

**Fig. S2** —Continued from the previous page. Rietveld analysis of XRD patterns for  $A_{1-x}A'_xWO_4$  nanocrystal solid solutions. Experimental (O) and calculated (—) patterns are shown for each sample along with the difference curve (—) and tickmarks (|) corresponding to the phase refined. The nominal composition of each phase is indicated in the top right of each pattern. —Continues on the following page.



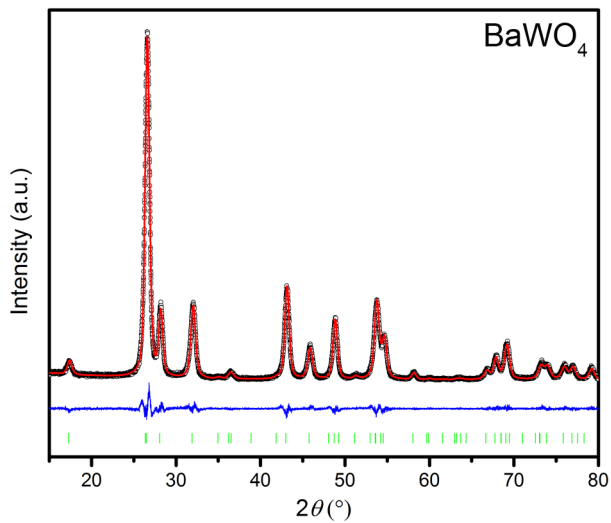

**Fig. S2** —Continued from the previous page. Rietveld analysis of XRD patterns for  $A_{1-x}A'_xWO_4$  nanocrystal solid solutions. Experimental (O) and calculated (—) patterns are shown for each sample along with the difference curve (—) and tickmarks (|) corresponding to the phase refined. The nominal composition of each phase is indicated in the top right of each pattern.

**Table S1.** Rietveld Analysis of X-ray Diffraction Data for  $A_{1-x}A'_xWO_4$  Nanocrystal Solid Solutions

|                                      | $Ca_{0.75}Sr_{0.25}WO_4$               | $Ca_{0.5}Sr_{0.5}WO_4$                 | $Ca_{0.25}Sr_{0.75}WO_4$              |
|--------------------------------------|----------------------------------------|----------------------------------------|---------------------------------------|
| $a$ (Å)                              | 5.2949(10)                             | 5.3368(10)                             | 5.3850(11)                            |
| $c$ (Å)                              | 11.5264(22)                            | 11.6616(22)                            | 11.8208(24)                           |
| $V$ (Å <sup>3</sup> )                | 323.16(19)                             | 332.14(19)                             | 342.79(21)                            |
| $x, y, z$ O                          | 0.6586(8),<br>0.4942(5),<br>0.2106(3)  | 0.6557(6),<br>0.4922(4),<br>0.2096(2)  | 0.6542(7),<br>0.4944(5),<br>0.2090(3) |
| W–O (Å)                              | 1.8742(27)                             | 1.8858(23)                             | 1.8893(27)                            |
| $U_A$ (Å <sup>2</sup> ) <sup>a</sup> | 1.35(3)                                | 1.29(2)                                | 1.29(2)                               |
| $U_W$ (Å <sup>2</sup> ) <sup>a</sup> | 1.08(2)                                | 2.30(2)                                | 1.03(2)                               |
| $U_O$ (Å <sup>2</sup> ) <sup>a</sup> | 2.77(16)                               | 2.64(14)                               | 4.69(18)                              |
| $R_{wp}$                             | 6.0                                    | 5.4                                    | 6.0                                   |
| $\chi^2$                             | 1.80                                   | 1.58                                   | 1.82                                  |
|                                      | $Sr_{0.75}Ba_{0.25}WO_4$               | $Sr_{0.5}Ba_{0.5}WO_4$                 | $Sr_{0.25}Ba_{0.75}WO_4$              |
| $a$ (Å)                              | 5.4500(16)                             | 5.5065(16)                             | 5.5560(14)                            |
| $c$ (Å)                              | 12.0684(35)                            | 12.3063(37)                            | 12.5046(31)                           |
| $V$ (Å <sup>3</sup> )                | 358.47(31)                             | 373.15(34)                             | 386.00(29)                            |
| $x, y, z$ O                          | 0.6494(11),<br>0.4929(7),<br>0.2046(3) | 0.6459(10),<br>0.4971(8),<br>0.2090(4) | 0.6336(9),<br>0.4932(9),<br>0.2092(4) |
| W–O (Å)                              | 1.8840(40)                             | 1.9110(40)                             | 1.9220(40)                            |
| $U_A$ (Å <sup>2</sup> ) <sup>a</sup> | 2.17(3)                                | 1.36(3)                                | 0.52(3)                               |
| $U_W$ (Å <sup>2</sup> ) <sup>a</sup> | 1.73(2)                                | 1.09(2)                                | 0.72(2)                               |
| $U_O$ (Å <sup>2</sup> ) <sup>a</sup> | 7.36(28)                               | 6.97(31)                               | 4.51(28)                              |
| $R_{wp}$                             | 5.8                                    | 7.3                                    | 8.2                                   |
| $\chi^2$                             | 1.56                                   | 2.13                                   | 2.17                                  |

<sup>a</sup> Given as  $100 \times U$

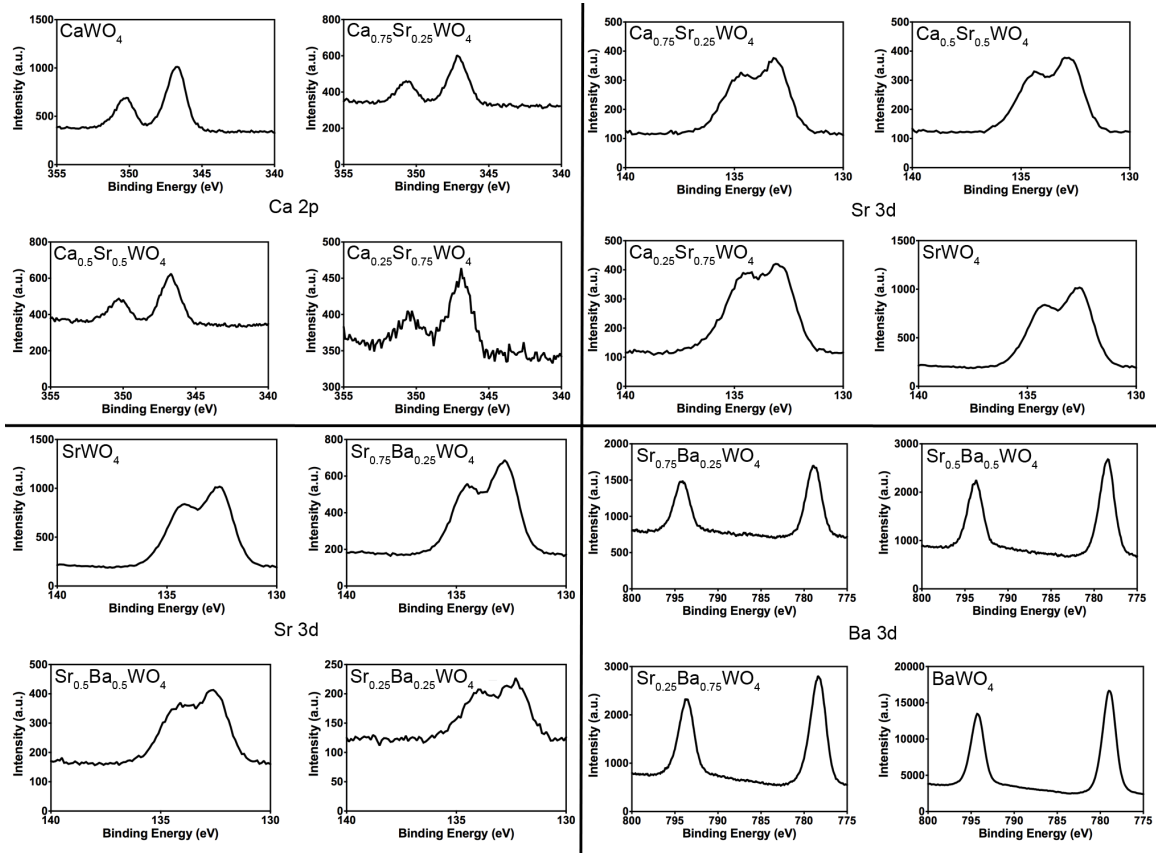

**Fig. S3** XPS spectra illustrating relevant states for the A-site atoms in the  $\text{A}_{1-x}\text{A}'_x\text{WO}_4$  nanocrystal solid solutions. All doublets can be assigned to divalent alkaline earth atoms.

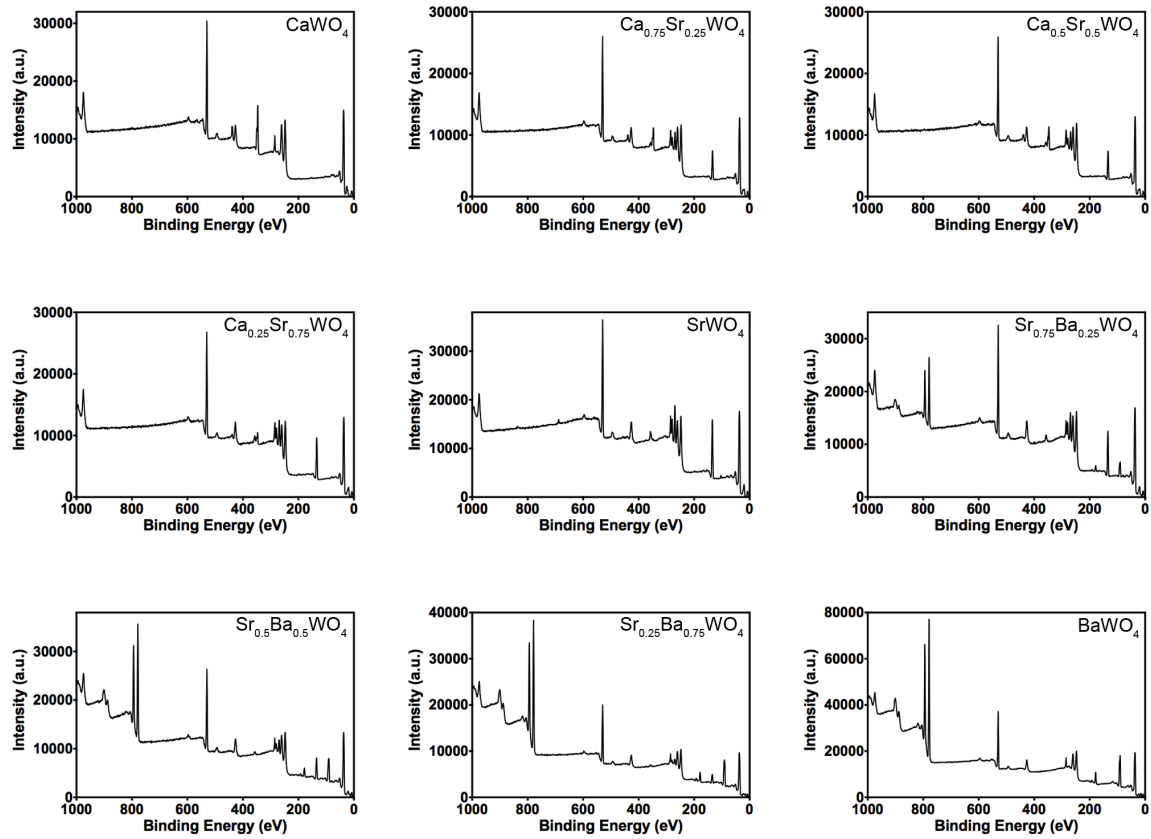

**Fig. S4** XPS survey spectra for the  $A_{1-x}A'_xWO_4$  nanocrystal solid solutions.

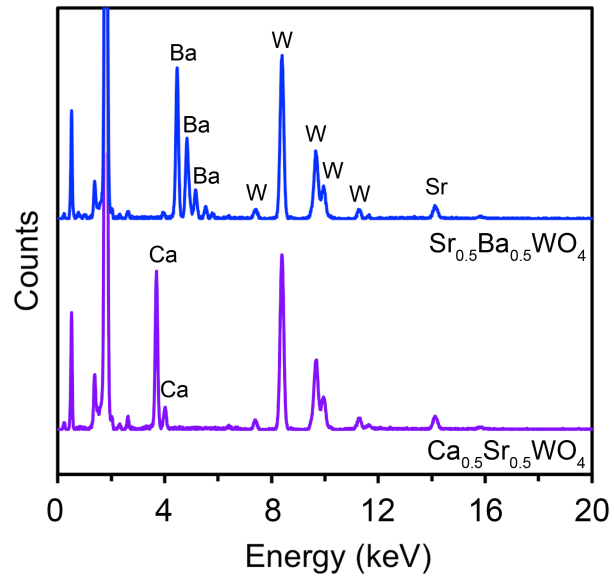

**Fig. S5** SEM-EDX spectra for the  $\text{Ca}_{0.5}\text{Sr}_{0.5}\text{WO}_4$  and  $\text{Sr}_{0.5}\text{Ba}_{0.5}\text{WO}_4$  nanocrystals.

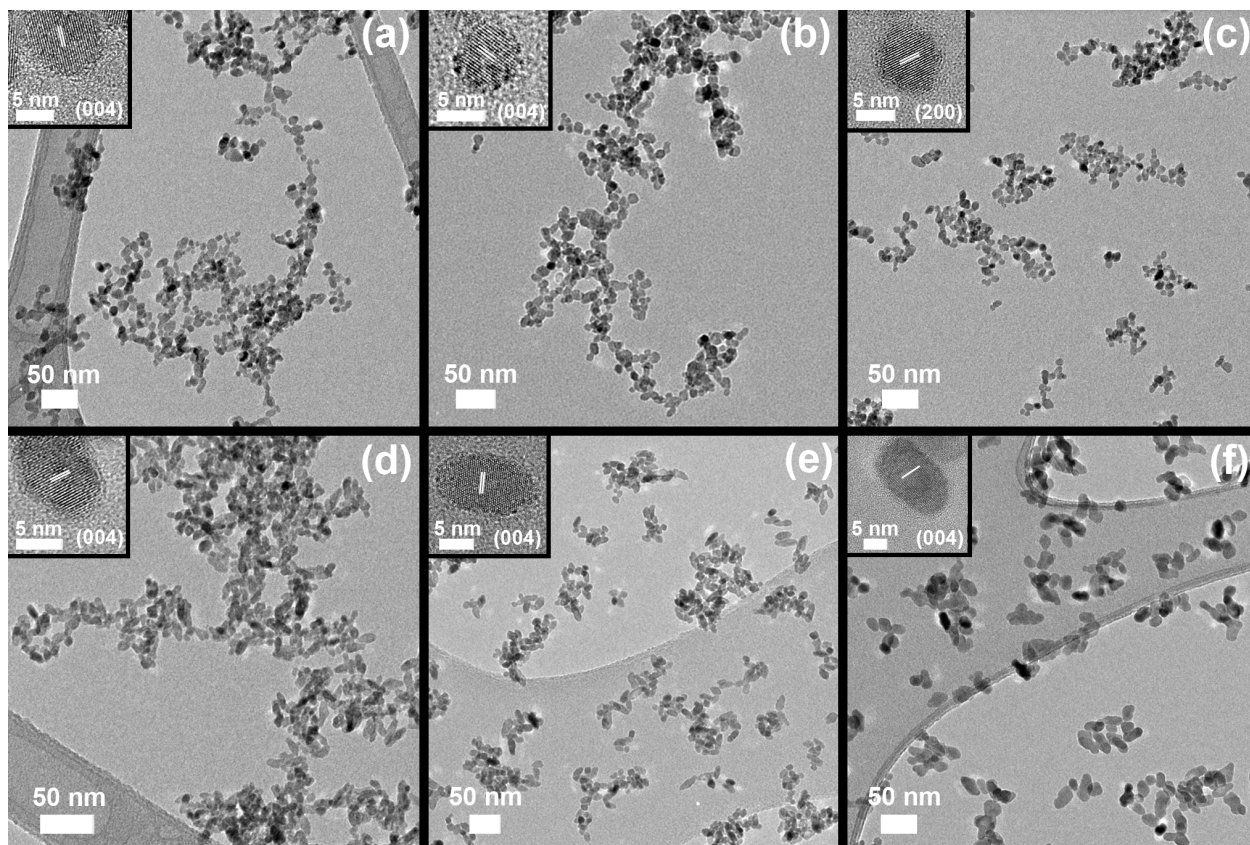

**Fig. S6** TEM images of (a)  $\text{Ca}_{0.75}\text{Sr}_{0.25}\text{WO}_4$ , (b)  $\text{Ca}_{0.5}\text{Sr}_{0.5}\text{WO}_4$ , (c)  $\text{Ca}_{0.25}\text{Sr}_{0.75}\text{WO}_4$ , (d)  $\text{Sr}_{0.25}\text{Ba}_{0.75}\text{WO}_4$ , (e)  $\text{Sr}_{0.5}\text{Ba}_{0.5}\text{WO}_4$ , and (f)  $\text{Sr}_{0.25}\text{Ba}_{0.75}\text{WO}_4$  nanocrystals. High-resolution TEM images for single  $\text{AWO}_4$  nanocrystals are provided in the insets.

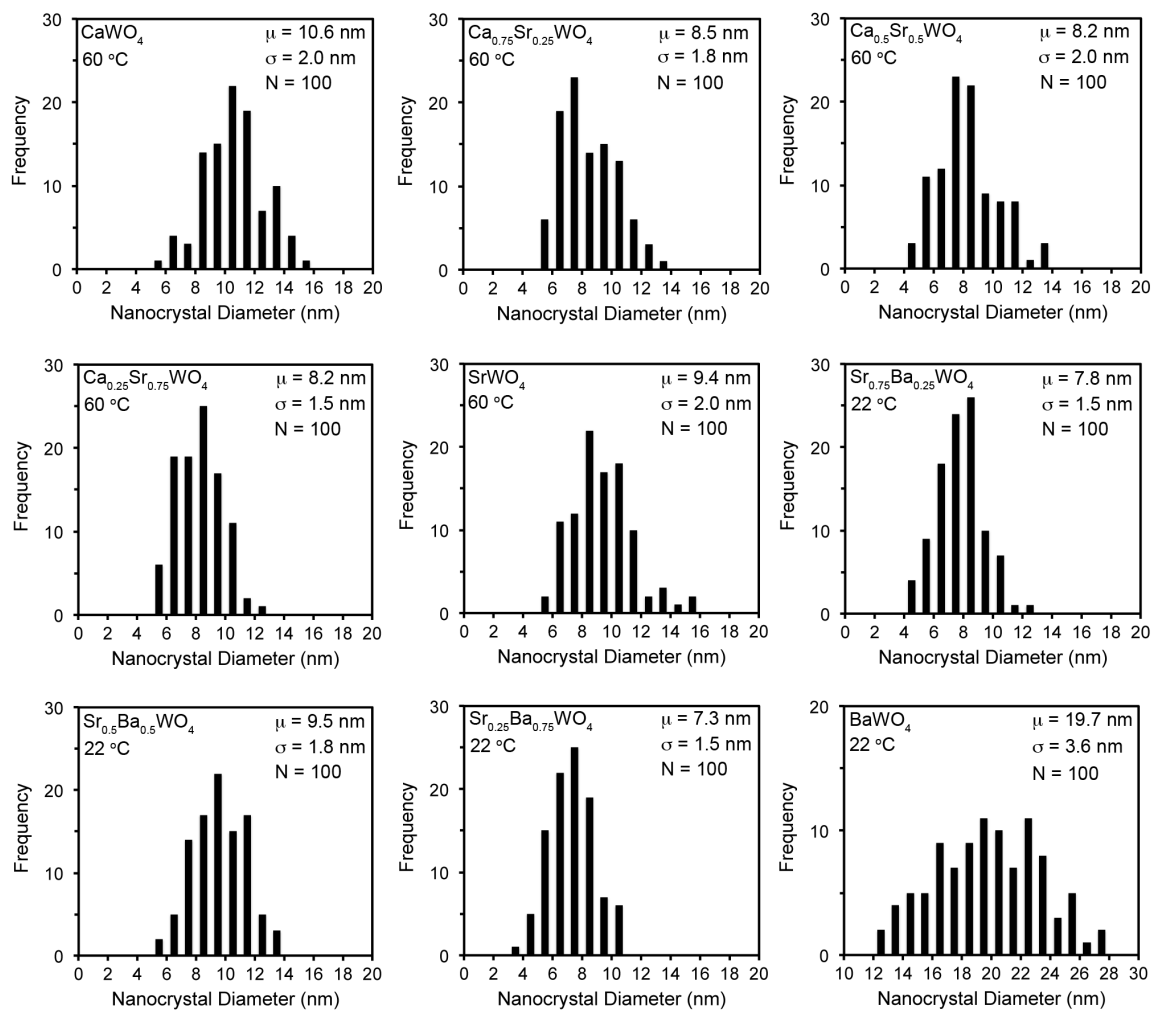

**Fig. S7** Nanocrystal size distribution histograms for  $\text{A}_{1-x}\text{A}'_x\text{WO}_4$  nanocrystal solid solutions. The total number of nanocrystals counted (N), mean diameter ( $\mu$ ), and standard deviation ( $\sigma$ ) are indicated.

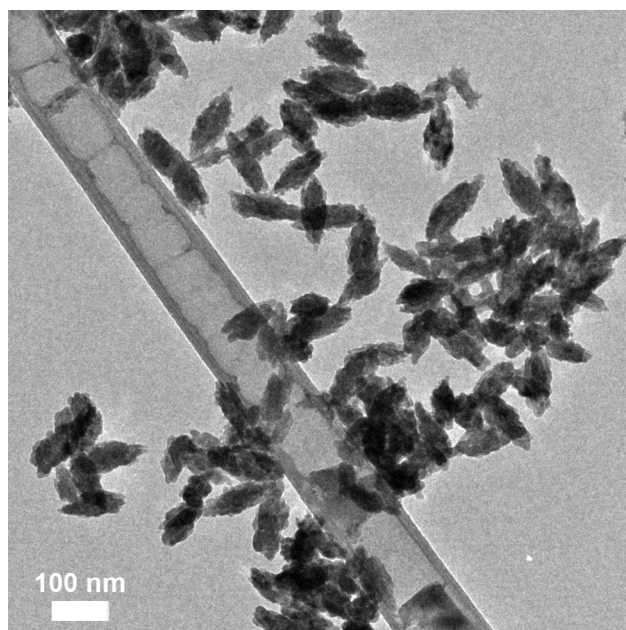

**Fig. S8** Representative TEM image of  $\text{Sr}_{0.75}\text{Ba}_{0.25}\text{WO}_4$  nanocrystals thermally aged at 100 °C under flowing nitrogen for 24 h.
